# Supplementary material for: Immunological memory in a teleost fish: common carp IgM+ B cells differentiate into memory and plasma cells
Source: PubMed Central journal article supplement (PMC11695322; doi:10.3389/fimmu.2024.1493840), 2024-12-20
Supplement: DataSheet2.pdf [file DataSheet2.pdf]

### Supplementary Table

**Table S1** Summary of all the oligonucleotides designed for this study against various (predicted) B cell or B cell-related markers. Oligonucleotides are divided into two groups: the first five primers target predicted (in common carp) B cell-associated markers whose expression we measured as part of Figure 4 and the Method Details section ‘Quantitative reverse transcription PCR (RT-qPCR) gene expression profiling of B cell activation and differentiation markers’; the second group includes primers targeting 18 *Cyprinus carpio* orthologues of grass carp B cell-associated genes that Pan et al. (1) identified by single-cell RNA sequencing as defining and clustering distinct head kidney IgM<sup>+</sup> B cell populations. We measured the latter group of genes as part of Figure 5 and the Method Details section ‘Multiplex qPCR gene expression profiling’. These two groups of primers are divided by a dashed line.

| Gene symbol            | NCBI or GenBank accession code | Gene product                                                                 | Forward (F) and reverse (R) primers (5’-3’)                     | Primer efficiencies (%) | Amplicon length (bp) |
|------------------------|--------------------------------|------------------------------------------------------------------------------|-----------------------------------------------------------------|-------------------------|----------------------|
| <i>tnfrsf13b</i>       | XM_042734762.1                 | <i>Cyprinus carpio</i> tumor necrosis factor receptor superfamily member 13B | F: CAGTGCTCCGAGCTGTGT<br>R: AGTACAGCGCTGATCCGGA                 | 98.68                   | 157                  |
| <i>xbp1</i>            | XM_042753507.1                 | <i>Cyprinus carpio</i> X-box binding protein 1                               | F:<br>AAAGCACTTCGAAGGAAACTGAAG<br>R: CGAGCTCCA ACTCCAAGACTT     | 97.91                   | 109                  |
| <i>syndecan-3-like</i> | XM_042777052.1                 | <i>Cyprinus carpio</i> syndecan-3-like                                       | F:<br>GTCTCTTATGGCCACATTTACTCG<br>R:<br>CCCACAGCAATAATGTCCCAAAA | 96.72                   | 122                  |

|              |                |                                                                                       |                                                           |        |     |
|--------------|----------------|---------------------------------------------------------------------------------------|-----------------------------------------------------------|--------|-----|
| <i>pax5</i>  | XM_019109396.2 | <i>Cyprinus carpio</i> paired box 5, transcript variants X1, X2, X3, and X4           | F: GGCTATGGCGTCTTTGGCT<br>R: TCGCGACCAGACACAAGTG          | 97.06  | 123 |
|              | XM_019109382.2 |                                                                                       |                                                           |        |     |
|              | XM_019109370.2 |                                                                                       |                                                           |        |     |
|              | XM_019109360.2 |                                                                                       |                                                           |        |     |
| <i>cxcr5</i> | XM_042743592.1 | <i>Cyprinus carpio</i> C-X-C chemokine receptor type 5, transcript variants X1 and X2 | F: CTAAACGGCGGAGGAACCT<br>R: GCCCAATAGCTTGCAGAGGA         | 100.51 | 150 |
|              | XM_042743591.1 |                                                                                       |                                                           |        |     |
| <i>cd22</i>  | XM_042754392,  | <i>Cyprinus carpio</i> cluster of differentiation 22                                  | F: CATTCTCTTGCTGATGTCCTTCAT<br>R: ATGAGCGTGTGTTTCAGAGGAGA | 88.48  | 99  |
|              | XM_042726754   |                                                                                       |                                                           |        |     |
| <i>cd34</i>  | XM_042713470   | <i>Cyprinus carpio</i> cluster of differentiation 34                                  | F: CTTACAGTTGCTGGGGACAG<br>R: AACAGGTTCAAAAGCAGGTCCAA     | 85.39  | 109 |
| <i>cd79b</i> | XM_042767177   | <i>Cyprinus carpio</i> cluster of differentiation 79b                                 | CCTCTCAGCTGAAGTAAATATCC,<br>TGACATCTGATCCATCTTTGACG       | 92.74  | 109 |
| <i>cd80</i>  | XM_042740109   | <i>Cyprinus carpio</i> cluster of differentiation 80                                  | CACAGCTGAGTACAGCGTTCC,<br>AGGTGGACGGGGCTTAATCAAA          | 95.26  | 143 |
| <i>cd83</i>  | XM_019119505   | <i>Cyprinus carpio</i> cluster of differentiation 83                                  | CCGTCATATGGTACAAGGTTTCT,<br>TGTCTAATGTAAGTGCAGAGGAC       | 87.66  | 173 |

---

|               |                                                 |                                                                                          |                                                          |        |     |
|---------------|-------------------------------------------------|------------------------------------------------------------------------------------------|----------------------------------------------------------|--------|-----|
| <i>cd86</i>   | XM_042778525                                    | <i>Cyprinus carpio</i> cluster of differentiation 86                                     | GTGCGCCATTCTTCATTAAGGG,<br>CTACATGAGGACGTCAGACTAG        | 92.14  | 148 |
| <i>cxcr4a</i> | XM_042725575                                    | <i>Cyprinus carpio</i> C-X-C chemokine receptor type 4 alpha                             | TACGAACACATCGTCTTTGAAGAT,<br>GAGCCAACTTTGAGGTTCCGTG      | 94.77  | 92  |
| <i>cxcr4b</i> | XM_042763477                                    | <i>Cyprinus carpio</i> C-X-C chemokine receptor type 4 beta                              | CTTCTTCATCTGTTGGTTGCCTTA,<br>TGCTGTCTCAACCCCATCCTTA      | 93.73  | 165 |
| <i>egr1</i>   | XM_019064348                                    | <i>Cyprinus carpio</i> early growth response protein 1                                   | ACTGGAGACACGCTTTCAGAAAT,<br>TCTTACACGGGCCGTTTCACC        | 97.00  | 102 |
| <i>ier2</i>   | XM_019067280                                    | <i>Cyprinus carpio</i> immediate early response protein 2                                | CTCTAGAAAGCGACGGAGCAAA,<br>CGTGCCTATGCCAAGAACAATTG       | 94.13  | 173 |
| <i>ighm</i>   | AB004106,<br>AB004107,<br>MH352354,<br>MH352353 | <i>Cyprinus carpio</i> immunoglobulin M heavy chain membrane-bound and secretory protein | CGAATATGCAGTTCCTATTCAAGA<br>T<br>AACATGTGGA ACTTGATGCCCC | 97.55  | 216 |
| <i>irf4</i>   | XM_019126566                                    | <i>Cyprinus carpio</i> interferon regulatory factor 4                                    | GGCCCTCTCAGATTACCGCTTA,<br>TAGTCCAGAGGGCTGTCAGCT         | 103.31 | 93  |
| <i>irf8</i>   | XM_042754085,<br>XM_042743728                   | <i>Cyprinus carpio</i> interferon regulatory factor 8                                    | ATCTTCAAAGCGTGGGCGATATT,<br>ATTTTGAGGAAGTTACTGACCGAT     | 91.43  | 130 |

---

|              |              |                                                      |                                                       |        |     |
|--------------|--------------|------------------------------------------------------|-------------------------------------------------------|--------|-----|
| <i>klf2</i>  | XM_019065449 | <i>Cyprinus carpio</i> Krüppel like factor 2 alpha   | GAAAACAGGTGGAAGGAGGAAC,<br>TTATTCTGGCCAACACTGTGGG     | 86.07  | 146 |
| <i>mki67</i> | XM_042735109 | <i>Cyprinus carpio</i> marker of proliferation Ki-67 | GTTCGGAAGGAAGCTGGACTG,<br>AGAACAAGGAGCTCATTTTGACC     | 100.37 | 103 |
| <i>pax5</i>  | XM_019109360 | <i>Cyprinus carpio</i> paired box 5                  | CAACAGGATCATTCGCACTAAAG,<br>GTGACCCAGGTATCTGCAGTAA    | 87.60  | 107 |
| <i>top2a</i> | XM_042735154 | <i>Cyprinus carpio</i> DNA topoisomerase II alpha    | ACTCAGCAAATGTGGGTGTTTGAT,<br>GGTTAACATTGACTCGGAGAATAA | 99.96  | 170 |
| <i>xbp1</i>  | XM_042753507 | <i>Cyprinus carpio</i> X-box binding protein 1       | TTGGAGTTGGAGCTCGAGAATC,<br>GACTGGGGTTAGATACCCTGG      | 93.73  | 121 |

(1) Pan Y, Wu C, Zhong Y, Zhang Y, Zhang X. An Atlas of Grass Carp IgM+ B Cells in Homeostasis and Bacterial Infection Helps to Reveal the Unique Heterogeneity of B Cells in Early Vertebrates. *J Immunol* (2023) **211**:964–980. doi: 10.4049/jimmunol.2300052.
